# Supplementary material for: A Systems Approach Uncovers Restrictions for Signal Interactions Regulating Genome-wide Responses to Nutritional Cues in Arabidopsis
Source: PLoS Comput Biol. 2009 Mar 20;5(3):e1000326. doi: 10.1371/journal.pcbi.1000326 (PMC2652106; doi:10.1371/journal.pcbi.1000326)
Supplement: Table S3 — (0.14 MB XLS) [file pcbi.1000326.s005.xls]

## Sheet: Krouk et al Table S3 Model Root
probe	C	N	L	C.N	C.L	L.N	C.N.L
AFFX-r2-At-Actin-M_s_at	676.386	0	857.264	0	0	0	0
AFFX-r2-At-Actin-3_s_at	613.7	0	1085.2	0	0	0	0
267628_at	-171.325	61.9077	-129.84	0	136.515	0	0
267595_at	0	0	377.218	0	94.5714	-164.729	0
267617_at	-894.025	0	-767.717	0	633.042	0	0
267544_at	129.22	0	77.1545	0	0	0	0
267548_at	-169.25	0	-149.642	0	110.867	0	0
267523_at	-487.875	0	-386.817	0	376.017	0	0
267524_at	-361.1	0	-365.492	0	312.217	0	0
267492_at	-374.27	0	-316.155	0	0	0	0
267477_at	-818.6	0	-844.2	0	677.075	0	0
267486_at	-643.325	0	-633.033	0	496.583	0	0
267373_at	-238.55	0	-210.867	0	202.717	0	0
267357_at	-1005.73	0	-971.625	0	814.525	0	0
267364_at	0	0	979.505	0	0	0	0
267340_at	-411.425	0	-469.8	0	233	0	0
267310_at	0	0	321.152	0	0	0	0
267308_at	83.6955	0	109.205	0	0	0	0
267212_at	553.023	0	632.727	0	0	0	0
267127_at	0	0	122.446	0	260.267	0	-252.65
267134_at	-336.575	0	-340.825	0	268.225	0	0
267096_at	137.814	0	157.329	0	0	0	-177.386
267101_at	0	0	709.38	0	0	0	0
267086_at	0	0	0	0	17.2929	0	-16.8
267052_at	-215.275	0	-290.825	0	165.725	0	0
267053_s_at	1750.25	0	1616.11	0	-1867.01	0	0
267035_at	-1715.88	0	-1715.83	0	1509.83	0	0
267045_at	-814.425	0	-746.742	0	682.142	0	0
266995_at	-491.4	0	-494.033	0	462.058	0	0
267004_at	46.9091	0	67.1909	0	0	0	0
266984_at	-1341.53	0	-1435.95	0	1016.42	0	0
266935_at	-57.7364	0	-66.3636	0	0	0	0
266904_at	-324.075	0	-478.725	0	315.375	0	0
266923_at	-444.525	0	-450.575	0	291.5	0	0
266924_at	45.8568	0	82.2432	0	0	0	0
266925_at	-324.4	0	-304.542	0	263.517	0	0
266882_at	0	0	597.277	0	-365.443	-344.743	0
266847_at	-80.245	0	0	0	0	0	0
266827_at	48.2768	0	92.9524	-54.9415	0	-52.1171	0
266799_at	-1036.62	0	-1418.82	0	700.867	0	0
266776_at	0	-16.2077	34.2404	0	-31.2154	0	0
266770_at	0	0	226.267	0	330.658	0	0
266745_at	0	0	27.385	0	0	0	0
266758_at	0	0	83.0375	0	0	-42.575	0
266712_at	-534	0	-490.583	0	452.258	0	0
266693_at	-1159.75	0	-1052.97	0	953.825	0	0
266658_at	-190.025	0	-226.6	0	155.525	0	0
266580_at	-176.7	0	-275.383	0	123.733	0	0
266565_at	21.7366	0	14.5988	-20.8293	0	-11.8415	0
266428_at	0	60.9693	-65.2568	-74.875	0	0	0
266413_at	187.206	0	105.157	-141.325	0	0	0
266363_at	-159.25	0	-157.1	0	133.55	0	0
266336_at	-232.725	239.308	-345.14	0	211.315	0	0
266313_at	0	349.267	0	0	0	0	0
266323_at	101.275	0	120.667	-52.55	-61.3167	0	0
266295_at	105.332	0	415.743	0	0	0	0
266266_at	92.1886	0	99.2114	0	0	0	0
266238_at	-228.875	0	-239.1	0	0	0	0
266259_at	-794.925	0	-880.258	0	650.733	0	0
266216_at	-40.35	0	56.9667	78.7833	0	77.4167	-178.483
266224_at	-318.1	0	-347.258	0	248.883	0	0
266150_s_at	-383.275	0	-429.592	0	306.767	0	0
266156_at	-831.05	0	-754.9	0	635.55	0	0
266140_at	-110.05	0	-135.558	0	97.5333	0	0
266116_at	-300.475	0	-346.675	0	260.85	0	0
266057_at	0	0	95.0075	0	0	0	0
266072_at	-1692.47	307.031	-1597.66	0	1433.56	0	0
266018_at	-183.625	0	-195.175	0	162.15	0	0
266019_at	-395.675	0	-422.092	0	316.342	0	0
266022_at	254.586	0	617.389	0	0	0	0
265987_at	-451.325	0	-501.583	0	436.108	0	0
265999_at	-196.45	0	-180.058	0	150.008	0	0
265953_at	-615.55	0	-664.408	0	439.383	0	0
265938_at	35.7857	0	65.2339	0	0	0	-33.9393
265886_at	28.8182	0	40.2568	0	0	0	0
265852_at	166.2	0	272.583	0	-309.333	0	0
265827_at	-76.4	0	-99.4583	0	68.3083	0	0
265796_at	-202.6	0	-207.2	0	179.025	0	0
265799_at	-161.436	0	-100.564	0	0	0	0
265771_at	0	0	102.25	0	0	0	-74.3625
265777_at	0	0	117.703	0	0	0	0
265733_at	0	0	-329.17	0	0	0	0
265735_at	450.815	0	0	0	0	0	0
265752_at	0	0	0	0	14.1071	0	-14.1
265712_s_at	-314.107	0	-399.543	0	0	0	0
265677_at	-122.832	0	-226.118	0	0	0	0
265678_at	0	0	44.5125	0	0	36.45	-57.15
265680_at	-1735.7	0	-1802.67	0	1323.77	0	0
265593_s_at	-344.425	0	-322.183	0	246.058	0	0
265545_at	52.6568	0	117.043	0	0	0	0
265481_at	-601.125	0	-670.858	0	587.533	0	0
265495_at	-338.8	0	-363.192	0	263.592	0	0
265475_at	0	0	0	2141.59	0	1248.14	0
265446_at	0	0	-306.197	0	0	0	0
265424_at	0	0	-269.303	0	0	0	0
265427_at	-92.725	0	-79.125	0	0	0	0
265440_at	-286.95	0	-404.925	0	307.75	0	0
265387_at	-336.025	0	-344.783	0	295.058	0	0
265357_at	0	0	724.66	0	0	0	0
265340_at	67.9682	0	70.3068	0	0	0	0
265343_at	-95.8886	0	-117.211	0	0	0	0
265291_at	-156.4	0	-177.3	0	133.025	0	0
265283_at	52.7932	0	70.5318	0	0	0	0
265266_at	-250.25	0	-255.275	0	133.5	0	0
265274_at	0	0	63.145	0	0	0	0
265253_at	0	0	46.1833	0	0	46.0417	0
265220_at	-513.925	0	-585.258	0	399.783	0	0
265187_at	602.045	0	258.055	0	0	0	0
265189_at	-219.3	0	-329.267	0	203.642	0	0
265118_at	-835.464	677.411	0	0	0	0	0
265070_at	-1033.7	0	-1001.71	0	975.958	0	0
265083_at	0	0	291.012	0	0	0	378.975
265097_at	0	0	40.4575	0	0	0	0
265067_at	-1087.38	0	-958.358	787.2	694.108	0	0
265043_at	-463.375	0	-711.133	0	422.883	0	0
265031_at	-131.232	0	-216.318	127.35	0	0	0
265008_at	0	0	-212.448	-181.018	0	0	0
265023_at	0	0	-106.05	0	0	0	0
264987_at	470.988	0	1047.37	0	0	-883.573	0
264970_at	-141.65	0	-202.608	0	105.933	0	0
264955_at	-393.775	0	-480	0	293.8	0	0
264916_at	162.525	0	156.55	0	0	0	0
264903_at	225.907	0	192.743	0	0	0	0
264908_at	-488	128.192	-594.86	0	379.285	0	0
264859_at	0	0	0	498.592	0	309.992	287.858
264836_at	-237.9	0	-277.583	0	191.033	0	0
264841_at	0	0	-253.08	0	0	0	0
264777_at	-293.95	0	-285.392	0	270.317	0	0
264779_at	-703.55	0	-576.867	0	585.942	0	0
264772_at	-261.5	0	-332.058	0	172.508	0	0
264745_at	0	0	376.61	0	0	0	0
264667_s_at	83.6143	0	172.654	0	0	0	-144.886
264668_at	458.578	0	381.834	577.825	0	0	0
264679_s_at	689.202	0	1667.4	0	0	0	0
264656_at	-147.7	0	-137.783	0	103.933	0	0
264580_at	-1075.97	0	-1258.08	0	999.008	0	0
264581_at	74.4091	0	117.716	0	0	0	0
264561_at	-670.775	0	-627.975	0	601.8	0	0
264562_at	118.717	0	120.806	-115.804	0	-77.3427	0
264532_at	0	0	136.055	0	0	0	0
264551_at	-437.575	0	-554.15	0	454.725	0	0
264508_at	-230.7	0	-259.558	0	183.158	0	0
264524_at	-1379.78	0	-1342.43	0	1321.78	0	0
264529_at	-941.575	0	-973.992	0	706.992	0	0
264470_at	0	0	0	331.292	0	148.892	-203.642
264482_at	-76.95	0	-81.5917	0	81.4667	0	0
264445_at	-897.075	0	-891.9	0	611.825	0	0
264463_at	-247.85	0	-234.567	0	215.217	0	0
264466_at	0	0	170.554	0	0	-84.9417	0
264467_at	-917.9	0	-924.783	0	800.358	0	0
264425_at	-306.975	0	-357.542	0	235.717	0	0
264376_at	-469.75	0	-462.292	0	290.517	0	0
264383_at	-511.175	0	-522.067	0	441.092	0	0
264386_at	252.873	0	192.602	0	0	0	0
264397_at	-70.525	0	-75.225	0	76.9	0	0
264348_at	1942.92	0	1697.08	0	-2376.2	1490.48	0
264365_s_at	-1030.2	0	-1723.48	1454.75	0	0	0
264336_at	-66.8933	-31.7433	-70.67	28.1867	47.8633	26.6633	0
264339_at	-1300.3	0	-1375.42	0	1122.02	0	0
264313_at	1510.75	0	567.175	0	-1383.25	0	1272
264315_at	154.2	0	343.083	0	317.217	0	-361.65
264299_s_at	0	0	-1105.56	0	0	0	0
264304_at	-447.225	0	-522.45	0	339.875	0	0
264306_at	-151.575	0	-164.858	69.65	89.4583	0	0
264260_at	617.28	0	573.12	0	0	0	0
264246_at	-1107.8	0	-1026.2	952.55	974.4	353.5	-856.8
264229_at	-1785.17	0	-1776.63	0	1619.08	0	0
264207_at	0	0	263.61	0	0	0	0
264211_at	0	0	854.075	0	0	0	0
264159_at	0	0	46.0125	0	74.625	0	0
264144_at	647.325	0	332.158	-414.95	-540.408	0	0
264095_at	154.757	0	136.389	0	0	0	-113.193
264098_at	43.9932	0	77.7568	0	0	0	0
264076_at	-53.7636	0	-27.7864	0	0	0	0
264055_at	0	0	33.425	0	0	0	0
264056_at	0	0	100.748	0	0	0	0
264057_at	0	0	87.68	0	0	0	0
264010_at	389.61	0	0	-298.05	0	0	0
264019_at	63.0375	-26.5625	37.0625	0	0	0	0
264025_at	0	0	49.5208	0	75.6667	0	-77
263937_at	-406.8	0	-449.992	0	329.767	0	0
263900_at	0	0	1045.05	0	0	0	0
263913_at	0	0	121.445	0	0	0	0
263865_at	331.95	0	524.108	0	496.417	0	-946.95
263866_at	0	0	-457.805	0	0	0	0
263862_at	-95.9273	0	-118.023	0	0	0	0
263827_at	-420.625	0	-436.025	0	369.025	0	0
263828_at	0	0	0	5.8	0	3.4	-9.85
263779_at	0	0	235.59	0	0	0	0
263788_at	0	0	-90.41	0	0	0	0
263799_at	-1122.03	0	-1235.64	0	952.617	0	0
263758_s_at	0	0	50.9625	0	0	0	74.55
263691_at	0	0	638.168	0	0	0	0
263692_at	307.059	0	259.516	0	0	0	0
263697_at	0	0	0	0	21.5286	0	-22.5
263703_at	-55.172	0	42.9707	59.7976	0	-39.5951	0
263654_at	-211.575	0	-175.042	0	155.092	0	0
263669_at	-540.325	0	-587.633	0	426.358	0	0
263647_at	-506.425	0	-547.017	0	411.642	0	0
263630_at	12.3432	0	47.5068	0	0	0	0
263591_at	101.293	0	206.436	0	0	0	-210.557
263490_at	-130.8	0	-145.4	0	133.425	0	0
263513_at	0	0	281.225	0	231.7	0	-262.3
263459_at	-102.961	0	-70.6136	0	0	0	0
263460_at	-619.075	147.077	-610.579	0	473.454	0	0
263467_at	-102.45	0	-93.4667	70.3	140.717	0	-102.7
263475_at	-602.775	0	-552.933	0	518.908	0	0
263438_at	-283.5	0	-300.45	0	201.8	0	0
263350_at	-2932.72	0	-2825.11	0	2635.53	0	0
263305_at	-92.05	0	-65.6833	0	82.3833	0	0
263319_at	-75.3559	0	-71.2088	529.971	0	0	-349.941
263330_at	-128.825	-36.0923	-133.015	0	113.415	0	0
263297_at	0	0	62.805	0	0	0	0
263275_at	-1686.58	0	-1437.03	0	1380.93	0	0
263265_at	-347.675	0	-348.558	0	321.533	0	0
263253_at	0	0	59.3375	0	69.75	0	-67.15
263216_s_at	-1301.65	258.438	-1413.33	0	1246.48	0	0
263223_at	239.484	0	313.641	0	0	0	0
263228_at	-270.7	0	-215.492	0	191.892	0	0
263232_at	0	0	45.2833	201.833	0	0	-154.733
263205_at	0	0	63.455	0	0	0	0
263182_at	-336.625	0	-512.5	0	298.9	0	0
263198_at	-141.225	0	-153.658	0	110.783	0	0
263157_at	-1914.58	0	-2066.93	0	1565.12	0	0
263118_at	-2190.32	0	-2142.07	0	2023.57	0	0
263128_at	0	0	191.632	0	0	0	0
263096_at	0	0	0	383.971	0	0	204.4
263100_at	0	0	22.1125	0	19.675	0	0
263064_at	0	0	671.296	0	-663.183	0	0
263075_at	-113.275	0	-95.8583	0	72.4833	0	0
263019_at	-1246	0	-1481.2	0	1060.95	0	0
263032_at	-187.002	0	-390.023	0	0	0	0
262986_at	-522.275	0	-557.217	0	457.467	0	0
262975_at	-670.925	0	-789.558	0	538.133	0	0
262980_at	259.505	0	346.045	0	0	0	0
262933_at	338.132	0	305.168	-234.65	0	0	0
262880_at	103.866	0	156.009	0	0	0	0
262881_at	195.588	0	123.458	-98.375	-130.683	0	0
262884_at	-492.925	0	-591.975	0	383.85	0	0
262885_at	0	0	-77.995	0	0	0	0
262837_at	88.505	0	0	-91	0	0	0
262845_at	-96.2	0	-122.683	0	75.3083	0	0
262801_at	274.175	0	249.475	-231.65	-384.625	-186.05	337.95
262805_at	-199.9	0	-224.033	0	223.458	0	0
262806_at	324.368	0	311.532	0	0	0	0
262770_at	-136.75	0	-145.933	0	127.308	0	0
262743_at	2281.53	0	878.358	-1219.8	-1173.21	0	0
262722_at	39.8352	0	42.3523	-55.075	0	0	0
262667_at	-330.375	70.3308	-344.662	0	213.412	0	0
262643_at	-698.575	0	-849.358	0	658.308	0	0
262633_at	-99.05	0	-84.1333	0	74.9583	0	0
262635_at	-1330.88	0	-1363.71	0	1228.73	0	0
262638_at	-77.975	0	-70.9833	0	61.0833	0	0
262590_at	0	0	680.023	0	0	0	0
262542_at	-85.1068	0	-60.6932	0	0	0	0
262505_at	-1743.67	0	-1918.82	0	1429.97	0	0
262456_at	-1893.53	0	-2243.88	0	1670.3	0	0
262440_at	252.95	0	0	-162.575	0	0	0
262396_at	153.875	0	183.618	0	-255.704	68.9714	0
262399_at	-1856.46	0	-1761	1345.97	1246.42	0	0
262355_at	-310.475	0	-313.858	0	278.458	0	0
262324_at	166.931	0	104.607	-177.725	0	0	0
262343_at	-644.05	0	-894.992	0	489.042	0	0
262295_at	-229.8	0	-323.35	0	162.75	0	0
262313_at	31.5477	0	41.4273	0	0	0	0
262262_at	-861.234	582.907	-776.257	449.968	785.032	0	0
262284_at	-578.3	0	-453.175	207.5	527.725	283.225	-390.775
262204_at	-383.225	0	-316.533	0	293.808	0	0
262161_at	139.255	0	258.995	0	0	0	0
262107_at	-117.95	-30.5462	-124.533	0	73.1577	0	0
262114_at	-544.575	0	-469	0	460.025	0	0
262012_s_at	-94.925	0	-107.658	0	85.6583	0	0
262026_at	-915.65	0	-1015.43	0	888.833	0	0
261979_at	1620.96	0	0	0	-796.45	0	0
261998_at	-33.825	0	-27.3	0	19.925	0	0
261956_at	0	0	4362.97	0	0	-3461.11	0
261957_at	-2422.5	0	-2636.53	0	2185.07	0	0
261970_at	0	0	490.498	0	0	0	0
261933_at	1876.77	0	976.82	-1291.03	0	0	0
261911_at	0	0	99.1952	62.2032	0	0	0
261860_at	-103.486	0	-238.739	0	0	0	0
261833_at	614.697	0	232.116	-379.025	0	0	0
261791_at	-141.491	0	-98.2091	285.25	0	0	0
261806_at	0	0	0	0	0	0	1941.75
261783_at	113.568	0	141.107	0	0	0	0
261757_at	-160.125	0	-201.875	0	136.725	0	0
261768_at	0	0	0	154.658	176.608	0	-186.808
261771_at	-255.1	0	-332.2	0	204	0	0
261748_at	-189.15	0	-250.367	0	138.542	0	0
261740_at	0	0	119.24	0	0	0	0
261664_s_at	0	0	43.5919	27.1387	0	0	0
261667_at	-155.6	0	-134.867	0	96.3667	0	0
261669_at	0	0	43.3708	0	0	-34.2083	0
261674_at	-1076.6	0	-916.192	0	815.867	0	0
261613_at	0	0	142.145	0	0	0	0
261615_at	-390.75	0	-334.275	131.5	181.975	0	0
261618_at	0	0	-49.785	0	0	0	0
261567_at	-474.775	0	-634.217	0	486.442	0	0
261574_at	0	0	617.73	0	0	0	0
261588_at	-80.3	0	-79.625	0	74.525	0	0
261558_at	-263.925	0	-243.017	0	238.867	0	0
261534_at	-750.55	0	-692.142	0	499.442	0	0
261514_at	0	0	105.11	0	0	0	0
261521_at	36.425	0	112.117	0	57.4583	0	-60.4
261500_at	1564.49	0	2103.48	0	0	0	0
261412_at	3476.8	0	3192.77	-2924.97	0	0	0
261421_at	0	0	66.6175	0	0	0	0
261362_s_at	676.936	0	1092.94	0	0	0	0
261265_at	-182.55	0	-126.667	0	92.0167	0	0
261224_at	0	43.0636	-110.689	0	0	0	0
261211_at	-597.125	0	-679.283	0	548.033	0	0
261143_at	-763.55	0	-894.683	0	508.433	0	0
260985_at	111.421	0	128.018	0	0	0	-89.7786
260944_at	107.025	0	152.125	0	123.575	0	-109.2
260956_at	0	0	1193.03	0	0	0	0
260896_at	150.327	0	146.398	0	0	0	0
260840_at	118.711	0	189.965	-165.899	0	-120.052	0
260855_at	-882.75	0	-749.55	0	673.5	0	0
260837_at	-474.75	0	-439.233	0	433.758	0	0
260814_at	0	0	0	457.747	0	428.647	0
260832_at	0	0	111.945	0	0	0	0
260807_at	-272.175	0	-308.025	0	241.05	0	0
260775_at	-789.725	0	-984.658	0	894.583	0	0
260753_at	0	0	706.59	306.71	-317.18	0	0
260771_at	0	0	-52.9371	84.6581	0	0	0
260741_at	-1179.1	0	-1170.52	0	1159.27	0	0
260687_at	-146.1	0	-155.742	0	102.417	0	0
260662_at	-290.875	0	-343.208	0	235.883	0	0
260649_at	3.405	0	0	-2.95	0	0	0
260624_at	71.68	0	0	-71.65	-56.2	0	83.05
260626_at	0	0	85.64	0	0	0	0
260635_at	0	0	-473.763	-328.358	0	0	0
260636_at	174.637	0	197.892	-115.675	-109.017	0	0
260638_at	-114.93	0	-153.245	0	0	0	0
260590_at	964.062	0	636.367	-434.275	-459.392	0	0
260592_at	-572.975	0	-897.133	0	507.883	0	0
260602_at	-458.075	68.5269	-710.854	0	381.404	0	0
260560_at	1660.59	0	0	-1183.45	-709.75	0	0
260565_at	0	0	74.9675	0	0	0	0
260529_at	-710.075	0	-768.583	0	631.108	0	0
260536_at	-313.575	0	-312.508	0	294.108	0	0
260494_at	0	0	63.5975	0	0	0	0
260475_at	-401.125	0	-522.5	0	425.525	0	0
260455_at	0	0	181.93	0	0	0	0
260429_at	-56.1477	0	-147.802	0	0	0	0
260379_at	-81.525	0	-89.6417	0	100.917	0	0
260392_at	344.359	0	194.941	0	0	0	0
260393_at	0	0	0	341.007	0	0	0
260317_at	-305.168	0	-288.182	0	0	0	0
260325_at	0	0	0	1286.05	0	637.65	0
260331_at	94.4477	0	156.127	0	0	0	0
260284_at	-3729.62	0	-4277.77	0	3873.43	0	0
260287_at	-2327.7	0	-2309.1	0	2173.32	0	0
260294_at	77.0977	0	119.377	0	0	0	0
260262_at	0	0	107.985	0	0	0	0
260226_at	-163.97	0	0	261.75	0	0	207.7
260208_s_at	-1110.7	0	-1116.28	0	1013.1	0	0
260191_at	-203.075	0	-210.9	0	139.875	0	0
260168_at	-123.695	0	-191.355	0	0	0	0
260059_at	0	0	0	0	0	254.421	0
260025_at	0	0	44.1125	0	0	0	0
260026_at	-826.325	0	-997.033	0	553.358	0	0
260009_at	20.1714	0	21.5304	0	0	0	27.9464
260010_at	-100.875	0	-112.142	0	93.1417	0	0
260015_at	-584.575	0	-654.633	0	559.658	0	0
259958_at	128.629	0	207.782	0	0	0	-198.421
259977_at	-1287.38	0	-1337.36	0	1091.21	0	0
259979_at	-1323.2	0	-1492.21	0	1232.73	0	0
259980_at	-648.7	0	-789.9	0	583.125	0	0
259982_at	-2367.12	0	-2624.2	0	2289.72	0	0
259983_at	0	0	-348.565	-271.49	0	0	0
259984_at	-467.575	0	-613.108	0	322.583	0	0
259936_at	0	0	200.355	0	0	0	0
259865_at	-228.393	0	-330.057	0	0	0	0
259882_at	160.857	0	223.793	0	0	0	0
259883_at	0	0	115.746	0	125.517	0	0
259888_at	0	0	0	-48.4071	0	0	0
259769_at	-346.675	0	-620.15	0	349.725	0	0
259771_at	309.316	0	510.884	0	0	0	0
259794_at	0	0	69.205	0	0	0	0
259736_at	461.68	0	685.97	0	0	0	0
259724_at	-83.7795	0	-176.995	0	0	0	0
259694_at	-437.125	0	-591.867	0	421.467	0	0
259596_at	405.55	0	609.583	0	-451.558	0	0
259498_at	-113.736	0	-178.014	0	0	0	0
259500_at	-631.075	0	-434.675	293.75	374.875	0	-273.6
259426_at	0	0	643.648	0	0	0	0
259416_at	-459.068	0	-318.382	0	0	0	0
259395_at	-137.9	0	-262.1	0	0	0	0
259364_at	-1255.46	0	-1290.73	307.675	977.208	0	0
259365_at	-1150.34	793.029	-1160.33	1046.17	819.979	0	0
259312_at	-537.225	0	-698.358	0	432.458	0	0
259316_at	-318.325	0	-286.075	0	272.15	0	0
259264_at	361.214	0	0	455.629	-363.821	376.343	0
259292_at	-252.575	0	-208.625	0	215.775	0	0
259232_at	-356.4	0	-391.142	0	337.242	0	0
259243_at	-105.3	0	-128.558	0	84.5333	0	0
259248_at	121.623	0	164.527	0	0	0	0
259225_at	0	0	21.225	0	0	0	36.3375
259211_at	-254	0	-300.567	0	176.967	0	0
259140_at	-128.175	41.4538	-173.208	0	111.308	0	0
259153_at	-171.136	0	-251.639	0	0	0	0
259076_at	-254.2	0	-151.883	84.2	145.983	0	0
259068_at	-291.059	0	-388.366	0	0	0	0
259015_at	-153.15	0	-174.45	0	121.225	0	0
259017_at	-632.05	0	-589.992	195.5	463.742	0	0
258978_at	-51.6568	0	-45.1932	0	0	0	0
258922_at	98.9523	0	215.823	83.75	0	0	0
258937_at	0	0	170.49	0	0	0	0
258900_at	0	0	980.543	0	0	0	0
258906_at	-428.85	0	-484.15	0	367.675	0	0
258856_at	-246.5	0	-261.15	0	212.15	0	0
258844_at	-103.53	0	-137.02	0	0	0	0
258805_at	0	0	0	0	0	129.911	0
258811_at	-833.95	0	-861.533	0	570.058	0	0
258771_at	-407.15	0	-324.15	0	294.9	0	0
258774_at	-728.425	0	-718.067	0	565.092	0	0
258750_at	0	0	120.483	0	140.767	0	0
258719_at	43.8385	0	101.511	0	0	-62.3981	0
258692_at	227.135	0	0	0	-206.75	0	0
258679_at	302.208	0	134.83	-210.725	0	0	0
258684_at	59.3682	0	110.657	0	0	0	0
258647_at	-162.19	0	-57.44	0	0	-83.08	110.59
258648_at	88.9125	0	48.3	-55.525	-49.375	0	0
258658_at	681.014	0	887.911	0	0	0	0
258659_at	-83.1636	0	-133.111	0	0	0	0
258629_at	0	133.73	0	125	0	0	0
258565_at	-380.9	0	-479.3	0	261.7	0	0
258527_at	-4133.25	0	-3993.03	0	3882.15	0	0
258532_at	254.873	0	439.077	0	0	0	0
258501_at	-206.375	0	-178.3	0	145.5	0	0
258491_at	-149.248	0	-220.152	0	0	0	0
258470_at	213.523	0	567.429	0	0	-196.354	0
258463_at	-248.452	0	-421.373	0	0	0	0
258415_at	1573.19	0	2081.34	0	0	0	0
258421_at	-435.225	0	-421.558	0	347.733	0	0
258437_at	0	0	0	417.721	0	0	0
258383_at	-64.975	0	-85.2833	0	60.8833	0	0
258395_at	-357.2	0	-350.917	0	337.417	0	0
258396_at	67.9818	0	82.2182	0	0	0	0
258398_at	-244.05	0	-219.1	0	208.925	0	0
258357_at	119.929	0	165.645	0	0	0	-107.796
258359_s_at	-242.4	0	-227.917	83.45	175.817	0	0
258341_at	0	0	35.52	0	0	0	0
258324_at	0	0	84.3825	0	0	0	0
258332_at	35.8886	0	92.8114	0	0	0	0
258338_at	-4724.38	0	-4655.9	0	4625.18	0	0
258284_at	0	0	747.947	0	0	0	0
258293_at	-1135.85	516.273	-1022.75	0	864.496	0	0
258222_at	0	0	87.325	0	0	0	0
258225_at	-2277.78	0	-1952.22	0	1492.1	0	0
258243_at	80.4318	0	131.268	0	0	0	0
258207_at	-618.062	0	-529.5	140.075	397.675	0	0
258208_at	441.85	0	301.383	0	-195.783	0	0
258139_at	0	0	372.905	0	0	0	0
258119_at	143.652	0	65.9727	-115.2	0	0	0
258122_at	0	0	97.7	0	0	0	0
258061_at	-438.7	0	-550.308	0	331.633	0	0
258040_at	117.214	0	275.961	0	0	0	0
258005_at	-2047.67	0	-2110.85	0	1886.55	0	0
258017_at	0	0	211.903	0	0	0	0
258020_at	176.3	0	81.2	0	0	0	-168.7
257990_at	-216.625	0	-182.95	0	157.375	0	0
257939_at	-1263.53	0	-1498.19	0	1254.94	0	0
257893_at	-155.127	0	-127.073	0	0	0	0
257894_at	-140.825	0	-132.292	0	128.592	0	0
257866_at	-292	0	-285.4	0	258.475	0	0
257816_at	143.843	0	171.707	0	0	0	0
257823_at	-1022.7	0	-975.125	0	817.225	0	0
257824_at	107.455	0	209.82	0	0	0	0
257834_at	-250.125	78.0269	-254.329	0	188.004	0	0
257791_at	-32.8705	0	-45.5295	0	0	0	0
257751_at	-137.35	0	-187.217	0	103.892	0	0
257755_at	67.9614	0	92.8886	0	0	0	0
257772_at	-112.05	0	-114.917	0	95.1667	0	0
257745_at	-1677.95	0	-2122.65	0	1490.45	0	0
257661_at	-238.125	0	-318.908	0	198.033	0	0
257670_at	-774.75	0	-551.242	0	846.517	0	0
257621_at	-395.35	0	-467.475	0	308.15	0	0
257624_at	-152.425	0	-139.475	0	134.15	0	0
257628_at	71.525	0	154.708	0	-87.9333	0	0
257645_at	0	76.195	0	116.25	0	0	0
257608_at	138.389	0	160.861	0	0	0	0
257611_at	-455.075	0	-310.783	0	271.058	0	0
257615_at	-757.475	0	-1240.04	0	733.017	0	0
257315_at	-979.702	0	-701.848	0	0	0	0
257213_at	167.586	0	80.7886	0	0	0	0
257215_at	-110.925	0	-133.258	0	98.0083	0	0
257198_at	0	0	113.478	0	0	0	0
257204_at	33.525	0	85.225	0	0	0	0
257173_at	587.485	0	1561.16	0	0	-735.931	0
257148_at	277.795	0	0	0	0	0	0
257151_at	139.33	0	161.745	0	0	0	0
257062_at	0	0	-247.795	0	0	0	0
257026_at	-59.3412	0	-97.9118	-68.4559	0	0	109.362
256981_at	45.3125	0	-29.075	-49.025	0	0	0
256958_at	-277.9	0	-290.6	0	272.95	0	0
256965_at	-486.15	0	-455.792	0	449.967	0	0
256914_at	-196.675	0	-209.467	0	158.692	0	0
256863_at	-109.275	0	-119.625	0	110.675	0	0
256875_at	0	0	108.672	0	0	0	0
256879_at	52.2182	0	47.9818	0	0	0	0
256771_at	-506.1	0	-540.658	0	376.858	0	0
256772_at	-538.175	152.812	-638.873	0	519.073	0	0
256785_at	-396.375	0	-570	0	0	0	0
256790_at	-145.77	0	-120.93	0	0	0	0
256745_at	558.28	0	384.045	0	0	0	0
256673_at	59.1068	0	64.7432	0	0	0	0
256698_at	-70.075	0	-53.1	0	52.825	0	0
256548_at	-1705.92	0	-1623.38	0	1605.83	0	0
256560_s_at	515.069	0	282.343	-435.825	0	0	0
256567_at	-105.298	0	-146.477	0	0	0	0
256525_at	-3034.62	0	-3134.48	0	2996.93	0	0
256528_at	0	0	0	0	0	176.486	0
256537_at	-81.9	35.85	-73.9	0	85.675	73.325	54.525
256453_at	317.902	0	0	-185.625	-151.025	0	0
256456_at	-182.075	0	-206.767	0	158.042	0	0
256458_at	-559.125	0	-650.642	0	497.642	0	0
256324_at	-139.425	0	-144.167	0	137.192	0	0
256337_at	-1319.7	0	-1424.16	0	1277.71	0	0
256353_at	-238.55	0	-268.817	0	175.467	0	0
256322_at	84.2409	0	68.0591	0	0	0	0
256300_at	-1783.3	0	-1641.95	0	1514.47	0	0
256238_at	-146	0	-207.175	0	138.975	0	0
256250_at	107.356	0	0	-112.852	0	54.0038	0
256216_at	558.364	0	670.161	0	0	0	0
256221_at	68.967	0	122.97	-85.375	0	0	0
256223_at	-976.175	0	-825.825	0	592.675	0	0
256224_at	863.675	0	697.842	0	-310.417	0	0
256186_at	1026.76	0	645.298	-813.425	0	0	0
256191_at	-392.05	0	-373.208	0	344.733	0	0
256193_at	-177.025	79.7462	-239.492	0	159.742	0	0
256131_at	-36.75	0	-43.4	0	30.3	0	0
256110_at	0	0	82.5875	0	0	0	0
256114_at	0	0	0	0	38.3214	0	-32.15
256091_at	-911.2	0	-569.967	0	475.567	0	0
256097_at	0	0	213.635	0	0	0	0
256050_at	-313.775	0	-558.65	0	298.775	0	0
256061_at	-457.2	0	-449.367	0	413.442	0	0
256065_at	0	0	100.985	91.0097	0	0	0
255994_at	-307.15	0	-269.225	0	233.2	0	0
255895_at	-50.95	0	-58.5	0	53.275	0	0
255881_at	-199.9	0	-206.217	0	175.492	0	0
255858_at	0	0	750.107	0	0	0	0
255874_at	22.2192	0	60.8365	0	0	-39.9615	0
255876_at	44.8455	0	93.5295	0	0	0	0
255776_at	424.461	0	768.439	0	0	0	0
255734_at	-562.438	0	-417.908	288.775	453.333	0	0
255723_at	-148.75	0	-138.775	0	156	0	0
255689_at	0	0	169.329	0	0	-109.442	0
255645_at	0	0	863.295	0	0	0	0
255647_at	51.3591	0	125.316	0	0	0	0
255626_at	-94.725	0	-133.811	0	88.0321	38.6071	0
255602_at	-176.925	0	-175.017	0	149.017	0	0
255617_at	-181	0	-178.75	0	116.325	0	0
255623_at	-51.325	0	-68.975	0	56.525	0	0
255591_at	0	0	0	85.4464	0	0	0
255560_at	0	0	88.33	0	0	0	0
255561_at	-182.382	0	-211.643	0	0	0	0
255478_at	-324.95	0	-388.775	0	266.65	0	0
255451_at	229.22	0	0	0	-175.4	0	0
255462_at	251.95	0	0	-271.25	0	0	0
255469_at	-199.625	0	-258.2	0	135.05	0	0
255411_at	-213.475	0	-202.6	0	220.375	0	0
255436_at	-61.875	0	-68.5833	0	54.5583	0	0
255381_at	-962.25	0	-1052.72	0	890.575	0	0
255365_at	-268.95	0	-196.417	110.55	152.017	0	0
255332_at	0	0	180.183	0	0	0	0
255345_at	40.4818	0	32.1182	0	0	0	0
255284_at	650.825	0	914.467	0	-841.717	0	0
255255_at	-1475.59	0	-1195.28	684.875	1006.36	0	0
255129_at	-550.05	0	-521.208	0	465.933	0	0
255104_at	200.989	0	424.986	0	0	0	0
255075_at	0	0	-89.0274	-65.1984	0	0	0
255037_at	-160.935	0	0	0	0	0	0
254981_at	297.473	0	458.027	0	0	0	0
254951_at	-1131.67	0	-1037.2	0	1171.3	0	0
254953_at	-212.075	0	-203.55	0	172.1	0	0
254862_at	351.35	0	401.342	0	-501.267	0	0
254831_at	315.891	0	422.284	0	0	0	0
254787_at	-126.275	0	-128.075	0	125.15	0	0
254763_at	195.234	0	170.366	0	0	0	0
254684_at	366.536	0	508.864	0	0	0	0
254688_at	-139.475	0	-154.5	0	101.2	0	0
254694_at	0	0	-244.005	-295.147	0	0	0
254656_at	136.566	0	340.984	0	0	0	0
254665_at	-1150.11	0	-1049.15	466.525	855.675	0	0
254644_at	-1224.21	0	-1299.32	429.975	1060.94	0	0
254616_at	-268.575	0	-300.733	0	217.108	0	0
254549_at	-272.559	0	-752.841	0	0	0	0
254496_at	-743.225	0	-679.167	0	671.167	0	0
254478_at	-48.8545	0	-72.4205	0	0	0	0
254446_at	433.055	0	497.895	0	0	0	0
254456_at	217.741	0	331.709	0	0	0	0
254399_at	-290.432	0	-257.368	0	0	0	0
254376_at	0	0	-215.338	0	0	0	0
254378_at	-412.101	0	-348.111	346.225	0	0	0
254340_at	201.65	0	343.6	-206.7	0	0	0
254341_at	81.675	0	101.325	0	0	0	0
254328_at	0	0	56.545	0	0	0	0
254281_at	32.7571	0	87.1643	0	0	0	-77.1429
254270_at	0	0	-867.878	0	0	0	0
254209_at	0	0	30.525	0	31.7	0	0
254218_at	17.0977	0	44.0523	0	0	0	0
254194_at	219.35	0	224.675	-193.7	-231.275	-95.725	182.775
254152_at	0	0	0	0	12.2	0	-11.15
254166_at	945.47	0	980.455	0	0	0	0
254119_at	484.173	0	912.691	0	0	274.071	0
254127_at	-209.123	0	-344.252	0	0	0	0
254092_at	353.625	0	186.983	0	-410.533	0	0
254093_at	0	0	-71.2875	0	0	0	0
254105_at	-140	0	-149.458	0	107.983	0	0
254057_at	-347.517	0	-353.37	280.125	0	0	0
254076_at	0	0	140.157	0	0	0	0
254027_at	0	0	0	54.2964	0	0	0
254029_at	0	0	90.1839	96.2274	0	0	0
254001_at	-67.8	0	-73.4417	0	59.7917	0	0
254004_at	114.064	0	195.586	0	0	0	0
253958_at	-93.3432	0	-127.407	0	0	0	0
253903_at	0	0	119.365	0	0	0	0
253864_at	-75.525	0	-84.0667	0	69.0417	0	0
253874_at	-1701.2	0	-2081.04	0	1556.27	0	0
253875_at	0	0	77.9958	0	86.3917	0	0
253879_s_at	0	0	320.57	0	0	0	0
253825_at	-121.625	0	-106.008	0	86.1583	0	0
253829_at	-414.875	0	-403.133	0	374.383	0	0
253806_at	-537.45	0	-505.7	213.35	340.2	0	0
253647_at	-665.675	0	-673.342	0	550.392	0	0
253650_at	0	0	149.01	48.64	0	-43.72	0
253610_at	-371.925	0	-306.858	0	330.883	0	0
253631_at	209.836	0	315.814	0	0	0	0
253606_at	559.1	0	302.567	0	-1045.57	0	0
253598_at	79.0795	0	101.52	0	0	0	0
253550_at	-322.8	0	-399.258	0	455.433	0	-310
253418_at	0	0	-254.355	0	0	0	0
253401_at	-802.5	0	-784.433	0	729.283	0	0
253373_at	-878.325	0	-806.567	0	792.217	0	0
253308_at	241.427	0	202.623	-100	0	0	0
253324_at	-236.9	0	-218.175	0	196.55	0	0
253270_at	0	0	130.6	0	45.025	0	0
253276_at	2856.1	0	2383.76	-1705.7	-1768.46	0	0
253279_at	-1263.58	0	-1273.12	0	1186.5	0	0
253235_at	-272.825	0	-297.375	0	198.1	0	0
253237_at	-80.1	0	-101.642	0	87.6667	0	0
253245_at	141.3	0	431.1	0	-238.8	-130.1	0
253204_at	-84.1295	0	-236.445	0	0	0	0
253215_at	65.2727	0	63.3364	104.555	-63.1818	79.1909	0
253145_at	0	0	76.115	0	0	0	0
253160_at	-93.75	0	-87.975	0	69.3	0	0
253113_at	79.9538	0	255.717	0	0	-121.242	0
253104_at	90.2625	0	0	0	0	0	0
253090_at	164.639	0	299.411	0	0	0	0
253043_at	-262.127	0	-190.423	514.4	0	0	0
253053_at	0	0	1667.03	0	0	0	0
253056_at	-54.9	0	-71.425	0	55.55	0	0
253061_at	-1003.62	0	-678.121	0	566.939	251.114	0
253010_at	25.9308	0	79.6635	0	0	-19.3885	0
253013_at	338.839	0	277.411	0	0	0	0
253017_at	0	0	56.5625	0	0	0	0
253006_at	0	0	-405.058	0	0	0	0
252991_at	-3205.22	0	-3238.44	0	3028.92	0	0
252955_at	384.387	0	141.25	-94.375	-178.775	0	0
252958_at	0	0	78.975	0	0	0	0
252915_at	-338.318	0	-261.607	0	0	0	0
252855_at	-2110.93	0	-2261.61	0	1964.73	0	0
252858_at	0	0	0	0	0	50.2679	0
252851_at	-179.275	0	-221.483	0	146.358	0	0
252827_at	858.075	0	639.108	0	-1004.33	0	0
252834_at	0	0	-409.748	0	0	0	0
252764_at	-262.541	0	-323.134	0	0	0	0
252751_at	-1205.85	0	-1267.95	0	967.025	0	0
252678_s_at	-750.625	0	-798.358	0	640.358	0	0
252625_at	124.538	0	226.248	0	0	86.3769	0
252607_at	356.765	0	229.698	-218.325	0	0	0
252596_at	181.919	0	92.4432	-190.875	0	0	0
252570_at	-1220.08	0	-1237.43	0	1159.66	0	0
252484_at	-120.1	0	-108.9	0	104.5	0	0
252442_at	37.9214	0	53.5429	0	0	0	103.621
252429_at	0	0	214.871	0	-89.0083	0	0
252387_at	-184.25	0	-243.55	0	169.225	0	0
252401_at	0	0	43.3975	0	0	0	0
252343_at	0	0	100.333	0	0	-45.5333	0
252325_at	-454.875	0	-709.267	0	342.017	0	0
252329_at	-54.61	0	0	0	0	0	0
252293_at	-1250.8	1403.17	-1746.68	0	1236.38	0	0
252294_at	0	0	905.035	555.36	0	0	0
252265_at	-371.125	0	-413.233	0	388.483	0	0
252250_at	-646.975	0	-702.825	0	611.95	0	0
252220_at	-728.37	271.136	-807.436	402.589	622.211	0	0
252205_at	0	0	239.821	0	-222.583	0	0
252119_at	67.9818	0	64.3182	0	0	0	0
252125_at	-111.125	0	-102.175	0	175.025	77.5	-204.7
252114_at	196.725	0	73.875	-101.25	-236.275	0	112.8
252067_at	-210.45	0	-266.808	0	181.533	0	0
252081_at	-430.038	0	-215.4	141.875	218.475	0	0
252040_at	-655.1	0	-1178.26	0	726.683	0	0
252047_at	-73.7477	0	-102.652	0	0	0	0
252057_at	-206.9	0	-213.767	68.45	113.267	0	0
252058_at	535.95	0	287.733	-284.8	-241.783	0	0
252025_at	0	0	111.578	0	0	0	0
252027_at	-150.602	0	-289.723	0	0	0	0
251993_at	306.1	0	108.183	0	-150.308	0	0
251996_at	-82.8	36.25	-107.7	0	74.15	0	0
251956_at	-283.275	0	-314.892	0	239.442	0	0
251911_at	-200.95	0	-206.575	0	163.375	0	0
251922_at	102.043	0	0	0	0	0	0
251901_at	-150.625	0	-184.958	0	95.4083	0	0
251886_at	0	0	477.254	0	291.408	0	0
251869_at	-64.975	0	-86.6083	0	63.2083	0	0
251845_at	-232.175	0	-178.108	0	171.983	0	0
251848_at	-278.575	0	-360.133	0	190.133	0	0
251786_at	-100.45	0	-150.242	0	77.5667	0	0
251797_at	-154.6	0	-227.475	0	125.05	0	0
251798_at	-140.62	0	-103.555	0	0	0	0
251775_s_at	-128.682	0	-186.643	0	0	0	0
251772_at	0	0	43.5	0	50	0	0
251719_at	-169.1	0	-142.192	0	137.517	0	0
251594_at	155.46	0	68.5023	-118.475	0	0	0
251561_at	867.525	0	267.158	-375.7	-792.058	0	674.95
251541_at	-296.6	0	-353.258	0	295.108	0	0
251491_at	-159.325	0	-237.767	0	164.692	0	0
251484_at	-59	0	-93.775	0	53.675	0	0
251438_s_at	-346.025	0	-348.2	0	297.15	0	0
251443_at	-319.15	0	-319.942	0	303.567	0	0
251459_at	-36.775	0	-59.15	0	52.475	0	0
251403_at	-267.011	0	-171.039	0	0	0	0
251396_at	462.548	0	0	1351.32	0	809.565	0
251356_at	-1968.4	0	-1336.58	0	1229.23	0	0
251314_at	-100.18	0	-101.445	0	0	0	0
251328_at	-378.05	0	-418.408	0	297.333	0	0
251283_at	-240.45	0	-228.208	0	169.633	0	0
251298_at	506.725	0	1053.22	0	-730.367	0	0
251305_at	88.625	0	102.8	0	-74.025	0	0
251269_at	144.15	0	148.725	0	0	0	0
251189_at	-754.95	0	-638.708	0	570.358	0	0
251195_at	0	0	0	0	0	42.825	0
251199_at	-100.923	0	-153.552	0	0	0	0
251150_at	54.1886	0	80.6614	0	0	0	0
251120_at	-83.275	0	-92.9833	0	78.8333	0	0
251133_at	-304.025	0	-284.283	0	218.883	0	0
251140_at	0	0	175.546	0	0	-110.083	0
251086_at	0	0	-87.395	0	0	0	0
251059_at	-513.55	0	-569.508	0	506.208	0	0
251039_at	-325.325	0	-347.358	0	308.633	0	0
250972_at	-344.525	0	-345.517	0	263.142	0	0
250933_at	145.661	0	160.414	0	0	0	0
250922_at	0	0	267.353	0	0	0	0
250898_at	396.961	0	530.914	0	0	0	0
250900_at	-123.325	49.3462	-135.192	0	104.892	0	0
250912_at	0	0	162.68	0	0	0	0
250877_at	-414.275	0	-390.733	0	334.383	0	0
250851_at	0	0	54.8	0	0	0	0
250858_at	-204.25	0	-214.008	0	164.933	0	0
250809_at	-88.2	0	-121.8	0	75.35	0	0
250816_at	246.059	0	206.666	0	0	0	0
250820_at	0	0	156.208	0	172.617	0	-240.65
250827_at	312.598	0	713.802	0	0	0	0
250790_at	-266.95	0	-226.483	0	167.458	0	0
250793_at	-624.9	0	-777.217	0	458.517	0	0
250752_at	-193.05	0	-188.483	0	168.008	0	0
250762_at	0	0	59.7325	0	0	0	0
250764_at	0	0	1213.71	0	0	0	0
250737_at	-293.225	0	-428.55	0	189.875	0	0
250680_at	-668.587	0	-746.583	355.975	493.758	0	0
250692_at	-297.35	0	-420.892	0	263.792	0	0
250697_at	-122.475	0	-126.725	166	135.925	0	-143.35
250664_at	-769.062	0	-788.1	315.975	591.775	0	0
250666_at	-185.825	0	-213.058	0	166.658	0	0
250575_at	-801.6	0	-910.067	0	627.642	0	0
250545_at	195.77	0	218.905	0	0	0	0
250540_at	32.9769	0	108.096	0	0	-33.8962	0
250505_at	120.332	0	78.5682	-76.55	0	0	0
250484_at	118.966	0	139.509	-74.6	0	0	0
250433_at	0	0	63.1	0	0	0	107.1
250441_at	-465.3	0	-494.842	0	406.192	0	0
250420_at	0	0	302.52	0	0	0	0
250377_at	306.635	0	215.135	0	0	203.445	-345.885
250382_at	-107.125	0	-83.825	50.05	89.525	31.35	-86.75
250334_at	196.075	0	-377.075	0	0	0	0
250336_at	-212.675	0	-164.242	116.25	182.192	0	-103.9
250337_at	0	0	176.179	0	0	-88.3917	0
250326_at	0	0	96.98	0	0	0	0
250305_at	0	0	177.123	0	0	0	0
250319_at	-244.2	0	-274.975	0	176.2	0	0
250268_s_at	33.2045	0	39.8955	0	0	0	0
250272_at	0	0	223.088	0	255.15	0	-307.05
250234_at	0	0	0	2456.55	0	0	0
250248_at	-509.925	0	-663.617	0	423.817	0	0
250249_at	-50.1568	0	-69.5432	0	0	0	0
250197_at	34.0682	0	90.3068	0	0	0	0
250114_s_at	-876.275	0	-944.658	0	779.208	0	0
250079_at	-156.975	0	-180.342	0	129.242	0	0
250074_at	0	0	0	0	60.2071	0	0
250055_at	572.3	0	465.625	0	-340.425	0	0
250017_at	-77.775	0	-95.5167	0	72.1667	0	0
250032_at	-1654.78	0	-1824.12	0	1573.32	0	0
250000_at	-417.05	0	-373.617	0	320.567	0	0
250008_at	-360.65	0	-306.925	0	295.1	0	0
249923_at	-2463.34	0	-2576.62	330.875	2052.6	0	0
249901_at	196.205	0	285.045	0	0	0	0
249862_at	-2254.7	0	-2192.59	0	1976.94	0	0
249869_at	-572.55	0	-597.167	0	535.742	0	0
249831_at	-264.35	0	-328.633	0	208.783	0	0
249832_at	26.2115	0	69.5269	0	0	-30.0769	0
249779_at	-104.814	0	-220.461	0	0	0	0
249734_at	0	0	36.79	0	0	0	0
249739_at	-163.12	0	-150.305	0	0	0	0
249742_at	-548.8	0	-643.6	0	510.75	0	0
249710_at	442.938	0	428.258	398.925	-377.233	0	0
249636_at	66.7	0	47.1	-42.65	0	0	0
249580_at	-524.25	0	-901.325	0	0	0	0
249599_at	0	0	489.792	0	0	-362.117	0
249475_at	0	0	63.3387	47.8742	0	0	0
249415_at	-176	0	-171.575	0	162.425	0	0
249439_at	69.1159	0	100.984	0	0	0	0
249354_at	75.3068	0	128.818	0	0	0	0
249325_at	0	0	0	497.603	0	544.253	0
249337_at	-939.3	0	-929.908	0	887.408	0	0
249255_at	36.7902	0	21.3037	-38.9122	0	-29.3256	0
249280_at	102.867	74.0167	0	-149.917	-150.7	-115.1	208.2
249165_at	29.575	0	68.9083	0	-41.4333	0	0
249167_at	83.4727	0	212.327	0	0	0	0
249140_at	-691.475	0	-668.267	0	562.692	0	0
249158_at	-135.725	0	-126.417	0	107.717	0	0
249009_at	-923.925	0	-570.175	0	669.125	0	0
249011_at	0	0	161.762	0	140.475	-94.725	-148.925
248978_at	1111.04	0	0	-890.075	0	0	0
248966_at	-252.675	0	-188.525	0	124.65	0	0
248969_at	-94.425	0	-111.575	0	85.05	0	0
248952_at	0	0	-385.632	0	0	0	0
248931_at	-159.175	0	-158.783	0	160.058	0	0
248901_at	-242.425	0	-273.192	0	187.917	0	0
248861_at	115.831	-90.7938	273.969	0	0	0	0
248868_at	-260.648	0	-384.077	0	0	0	0
248819_at	0	0	-140.192	0	0	0	0
248820_at	0	0	208.963	0	0	-157.025	0
248827_at	81.65	0	131.492	0	-137.517	0	164.15
248756_at	-1473.28	0	-1569.86	0	1426.51	0	0
248778_at	0	0	53.705	0	0	0	0
248703_at	-1074.53	0	-998.157	2238.53	0	0	0
248685_at	0	0	111.903	0	0	0	0
248670_at	0	0	0	0	20.7964	0	0
248676_at	137.215	0	116.298	-153.125	0	0	0
248639_at	1267.22	0	592.775	-1040.9	-1178.17	0	754.8
248622_at	-1281.08	0	-1309.3	0	1214.7	0	0
248606_at	-1553.67	0	-1598.58	0	1443.88	0	0
248607_at	681.552	0	0	0	-474.517	604.685	0
248591_at	-207.525	0	-194.783	0	182.033	0	0
248564_at	-86.05	0	-114.733	0	84.6583	0	0
248580_at	-156.073	0	-144.302	0	0	0	0
248508_at	-199.7	0	-205.842	0	127.392	0	0
248512_at	549.439	0	468.686	0	0	0	0
248474_at	378.644	0	0	0	0	357.329	0
248432_at	-89.775	0	-95.2667	0	81.9167	0	0
248434_at	133.8	0	59.425	-67.65	-63.275	0	0
248372_at	-55.525	0	-63.2083	0	45.0083	0	0
248382_at	0	0	0	0	165.371	0	-132.5
248392_at	0	0	0	0	0	46.2357	0
248393_at	268.836	0	292.314	-222.15	0	0	0
248398_at	-1134.22	0	-1064.72	370.8	825.525	0	0
248338_at	-43.2523	0	-66.3727	0	0	0	0
248324_at	0	0	0	107.607	0	0	0
248285_at	-106.875	32.0269	-98.1538	0	90.2538	0	0
248276_at	-188.95	0	-223.408	0	141.433	0	0
248230_at	23.7071	0	60.1768	0	0	0	-32.1679
248183_at	150.85	0	284.1	0	-221.95	0	0
248193_at	-1015.7	0	-989.142	0	870.217	0	0
248200_at	1391.05	0	2408.41	0	-1611.76	0	0
248121_at	38.8705	0	57.0795	0	0	0	0
248139_at	87.9409	0	104.634	0	0	0	0
248043_s_at	1340.23	0	1422.54	0	0	0	0
248045_at	667.432	0	1077.12	0	0	0	0
248050_at	-1382.67	0	-1393.4	0	1337.35	0	0
247994_at	-130.639	0	-258.161	0	0	0	0
248002_at	-84.525	0	-88.725	0	79.3	0	0
248021_at	106.043	0	189.136	0	0	0	-161.057
247989_at	852.825	0	362.708	-360	-357.708	0	0
247988_at	0	0	0	0	0	0	-51.225
247954_at	-2464.25	0	-2401.15	0	2139.15	0	0
247937_at	0	0	273.275	0	361.1	0	-353.1
247900_at	234.986	0	402.364	0	0	0	0
247908_at	20.9214	0	36.1054	0	0	0	22.8964
247918_at	0	0	87.0083	0	171.667	0	-222.9
247921_at	-297.925	0	-216.45	177	230.5	130.975	-169.625
247924_at	-1556.8	0	-1777.66	0	1423.23	0	0
247863_at	-343.35	0	-376.117	0	249.042	0	0
247835_at	-169.757	0	-203.368	0	0	0	0
247840_at	-192.225	0	-258.817	0	166.817	0	0
247842_at	92.2591	0	76.7659	0	0	0	0
247819_at	-273.623	0	-474.927	0	0	0	0
247790_at	-221.45	0	-184.758	0	165.883	0	0
247794_at	0	0	115.508	0	0	-90.6083	0
247768_at	49.6	0	47.525	0	-52.8	68	0
247746_at	31.3523	0	49.5977	0	0	0	0
247754_at	-192.3	0	-260.808	93.35	155.358	0	0
247638_at	101.27	0	109.33	0	0	0	0
247611_at	-262.75	0	-268.317	0	206.792	0	0
247585_at	-307.125	0	-416.717	0	284.692	0	0
247569_at	111.93	0	133.57	0	0	0	0
247574_at	-255.45	0	-206.225	0	170.35	159.05	-176.4
247549_at	320.525	0	457.025	160.1	-435.825	0	0
247520_at	0	0	75.4675	0	0	0	0
247543_at	-1063.05	0	-1293.87	0	936.517	0	0
247494_at	976.55	0	612.032	0	-515.321	283.129	0
247452_at	61.15	0	66.4179	0	-69.3286	91.7214	0
247453_at	34.5143	0	40.3786	0	0	0	71.0643
247443_at	0	0	0	379.919	-131.831	125.419	0
247364_at	-89.42	0	0	0	0	0	0
247351_at	0	0	-342.312	0	0	0	0
247353_at	-674.425	0	-620.158	0	562.083	0	0
247298_at	120.634	0	179.641	0	0	0	0
247268_at	0	0	49.4042	0	88.7583	0	0
247273_at	0	0	149.971	0	62.4667	0	-137.4
247280_at	-2071.18	0	-2109.1	0	2333.22	0	-686.25
247282_at	0	0	-278.812	0	0	0	0
247288_at	0	0	55.7583	0	78.3667	0	-74
247243_at	0	0	78.3175	0	0	0	0
247176_at	-491.65	0	-457.892	0	360.392	0	0
247123_at	-357.475	0	-372.292	0	326.392	0	0
247140_at	-228.887	-99.25	-190	121.425	146.625	0	0
247108_at	-56.8932	0	-59.7318	0	0	0	0
247097_at	71.5143	0	96.7411	0	0	0	79.6893
247075_at	74.0909	0	70.9091	0	0	0	0
247054_at	-119.125	0	-163.833	0	93.6833	0	0
247069_at	266.77	0	394.63	0	0	0	0
247029_at	-29.2205	0	-71.6795	0	0	0	0
247030_at	54.3114	0	48.0136	0	0	0	0
247042_at	0	0	138.877	0	0	0	0
246996_at	-296.339	0	-505.936	550.75	0	0	0
247007_at	373.075	0	133.775	0	-180.7	0	0
246958_at	-387.1	0	-488.742	0	231.742	0	0
246959_at	-121.361	0	-239.639	0	0	0	0
246975_at	-513.6	0	-511.425	0	382.775	0	0
246923_at	212.055	0	270.295	0	0	0	0
246935_at	-345.189	0	-657.261	0	0	0	0
246911_at	0	0	219.532	0	0	0	0
246861_at	0	0	960.715	0	0	0	0
246854_at	0	0	0	194.158	0	77.4583	-78.0583
246843_at	-393.875	0	-317.017	0	332.367	0	0
246822_at	0	0	-48.5675	0	0	0	0
246802_at	39.0902	0	127.254	-49.9622	0	-71.0756	0
246781_at	-305.475	0	-217.392	153.45	203.242	0	0
246755_at	-310.895	0	-276.255	0	0	0	0
246644_at	-193.95	0	-249.433	0	165.608	0	0
246584_at	322.5	0	-283.9	-511.8	-324.65	0	445.65
246566_at	-111.375	0	-103.242	0	84.4167	0	0
246389_at	0	0	0	140.707	0	0	0
246396_at	-904.7	0	-884.225	0	790.925	0	0
246398_at	-248.4	0	-264.517	101.95	138.017	0	0
246408_at	-263.9	0	-294.817	0	200.167	0	0
246304_at	-1577.5	0	-1507.12	0	1250.08	0	0
246311_at	-299.375	0	-221.192	0	201.392	0	0
246286_at	0	0	271.675	0	0	0	0
246238_at	-272.775	113.142	-324.26	0	247.835	0	0
246197_at	-274.23	0	-220.27	0	0	0	0
246210_at	0	20.7968	0	0	43.0145	0	0
246211_at	-628.8	0	-654.475	0	464.25	0	0
246170_at	-424.675	0	-352.775	0	308.075	0	0
246142_at	0	0	0	242.125	0	0	0
246146_at	-65.5208	52.1792	-82.7542	0	0	0	0
246119_at	-267.475	0	-279.733	0	229.333	0	0
246098_at	0	99.7875	0	-76	-98.6125	-170.3	194.312
246007_at	-33.7545	0	-70.3455	0	0	0	0
246028_at	-1667.35	0	-1727.58	0	1431.36	0	0
245977_at	0	0	0	531.797	0	229.397	0
245984_at	-140.575	0	-204.267	0	139.467	0	0
245912_at	0	218.615	0	0	0	0	0
245887_at	-146.1	0	-88.1333	0	80.0083	0	0
245849_at	49.7659	0	74.6591	0	0	0	0
245868_at	-924.625	0	-857.925	0	616.35	0	0
245789_at	-178.47	0	-90.6545	0	0	0	0
245794_at	-1044.03	0	-1135.05	0	1123.88	0	0
245807_at	-216.475	0	-202.442	0	171.217	0	0
245761_at	-86.8273	0	-99.0727	0	0	0	0
245775_at	-395.324	0	-411.939	362.325	0	0	0
245731_at	0	0	-184.003	-157.865	0	0	0
245684_at	-148.195	0	-322.23	0	0	0	0
245626_at	-1058.78	0	-1079.71	0	864.608	0	0
245637_at	-213.275	106.062	-167.148	0	175.773	0	0
245642_at	-1701.8	0	-2037.69	0	1366.12	0	0
245556_at	-183.275	0	-394	0	0	0	0
245492_at	43.1568	0	77.3682	0	0	0	0
245421_at	0	0	27.85	35.7833	0	29.9333	-52.1833
245400_at	-305	0	-212.433	0	164.533	0	0
245401_at	0	0	925.075	0	0	-854.175	0
245348_at	0	0	191.512	0	366.85	0	-441.8
245353_at	-669.85	0	-724.25	0	634.925	0	0
245252_at	-323.375	0	-362.883	0	212.058	0	0
245262_at	-212.8	0	-241.242	0	200.267	0	0
245229_at	-123.275	58.7962	-150.392	0	125.192	0	0
245209_at	-258.979	0	-635.894	-337.997	0	0	472.494
245155_at	401.639	0	174.986	-304.85	0	0	0
245168_at	-1035.83	0	-1441.47	0	1027.28	0	0
245175_at	673.345	0	612.905	0	0	0	0
245123_at	-188.3	-53.05	-184.6	71.75	184.05	55	-71.95
245136_at	-265.35	0	-349.092	0	249.092	0	0
245094_at	54.0045	0	115.37	0	0	0	0
245101_at	529.85	0	399.042	-322.2	-302.942	0	0
245117_at	0	146.96	0	193.925	0	0	0
245043_at	-144.984	0	-144.866	0	0	0	0
244993_s_at	0	0	123.838	0	0	0	0
257407_at	-633.85	0	-658.783	0	576.508	0	0
